# Supplementary material for: First-Principles Study of a MoS2-PbS van der Waals Heterostructure Inspired by Naturally Occurring Merelaniite
Source: MDPI journal article supplement (doi:10.3390/ma14071649), 2021-03-27
Supplement: s1 [file s1]

Supplementary Materials

# First-Principles Study of a MoS<sub>2</sub>-PbS van der Waals Heterostructure Inspired by Naturally Occurring Merelaniite

Gemechis D. Degaga <sup>1</sup>, Sumandeep Kaur <sup>1</sup>, Ravindra Pandey <sup>1,\*</sup> and John A. Jaszczak <sup>1</sup>

<sup>1</sup> Department of Physics, Michigan Technological University, Houghton, MI 49931, USA; gdegaga@mtu.edu (G.D.D.); sumandek@mtu.edu (S.K.); jaszczak@mtu.edu (J.A.J.)

\* Correspondence: pandey@mtu.edu

## 1.0. Electronic Properties: Band Structure and Density of States

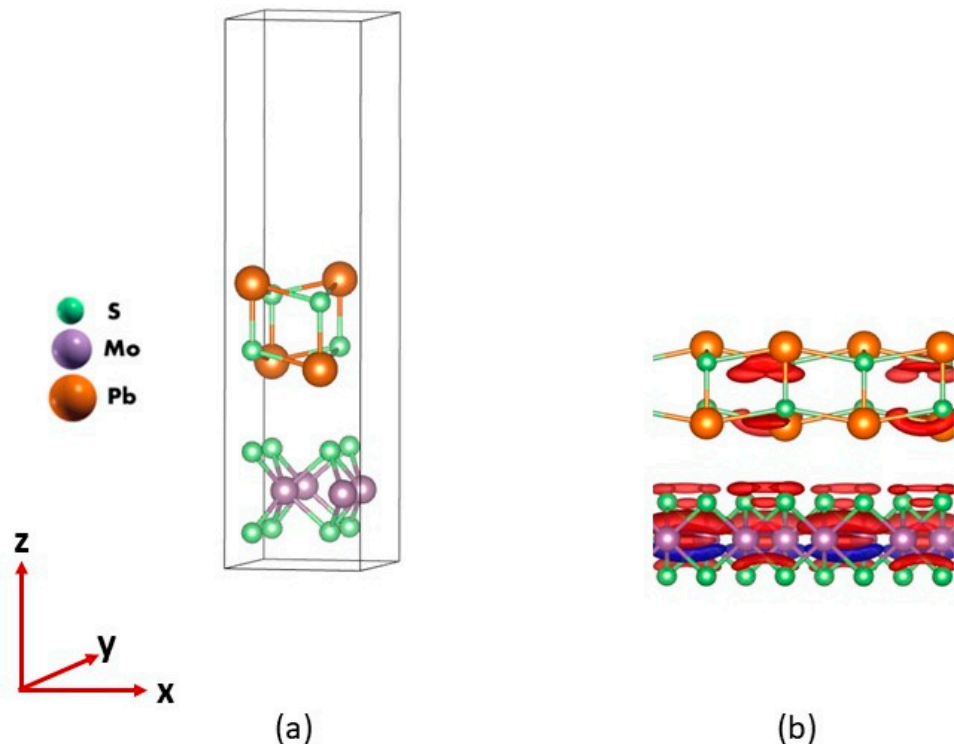

**Citation:** Degaga, G.D.; Kaur, S.; Pandey, R.; Jaszczak, J.A. First-Principles Study of a MoS<sub>2</sub>-PbS van der Waals Heterostructure Inspired by Naturally Occurring Merelaniite. *Materials* **2021**, *14*, 1649. <https://doi.org/10.3390/ma14071649>

Academic Editor: Shirley Chiang

Received: 14 February 2021

Accepted: 24 March 2021

Published: 27 March 2021

**Publisher's Note:** MDPI stays neutral with regard to jurisdictional claims in published maps and institutional affiliations.

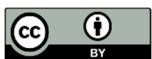

**Copyright:** © 2021 by the authors. Submitted for possible open access publication under the terms and conditions of the Creative Commons Attribution (CC BY) license (<http://creativecommons.org/licenses/by/4.0/>).

**Figure S1.** (a) The unit cell of a 2D heterostructure of MoS<sub>2</sub>-PbS, and (b) the charge density difference plot for the MoS<sub>2</sub>-PbS heterostructure. (blue for depletion and red for accumulation). Isovalue 0.01 e/Å<sup>3</sup>.

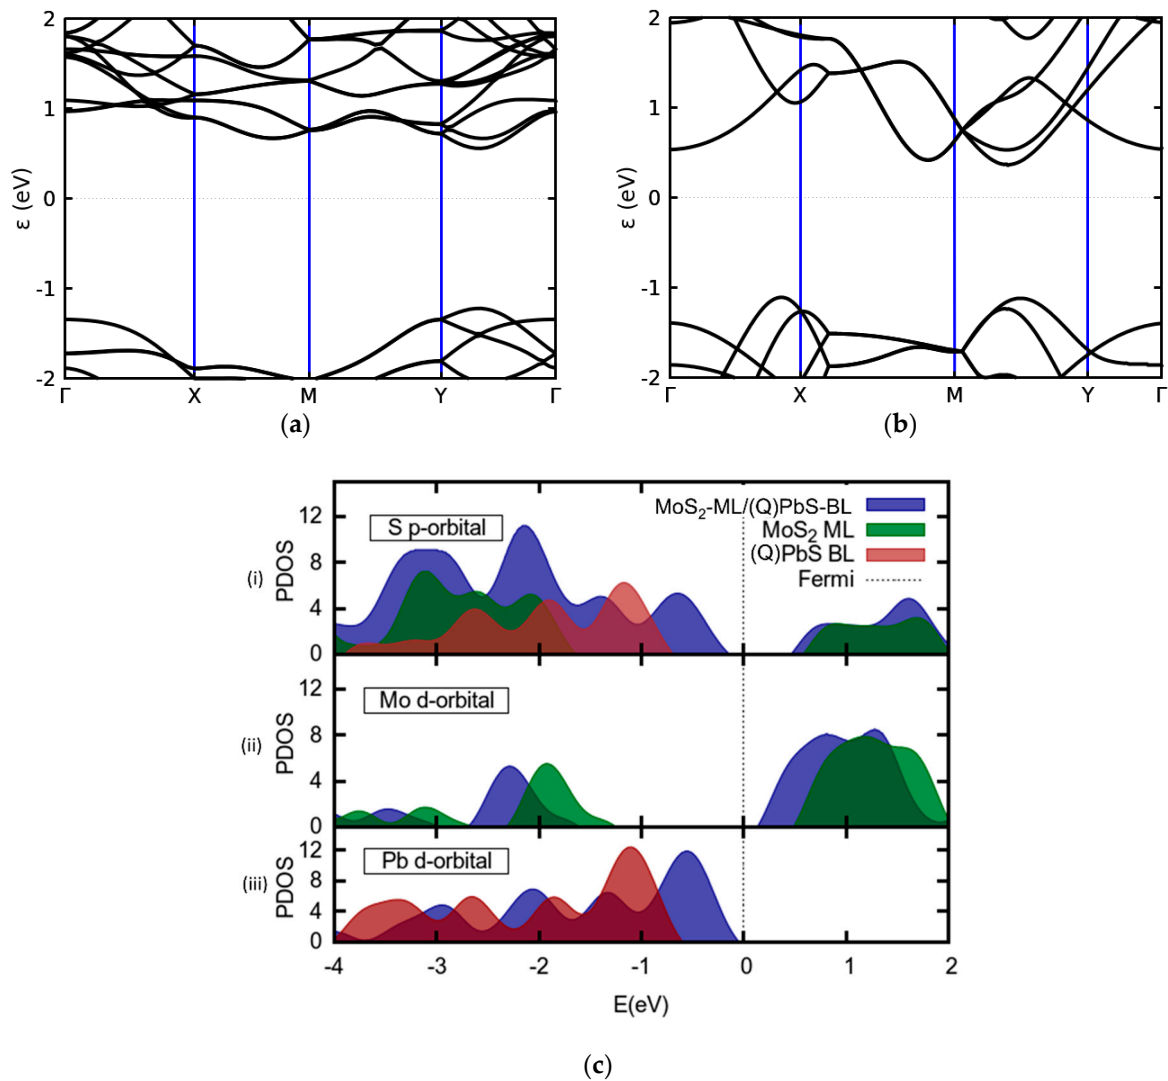

**Figure S2.** Calculated band structure of the (free standing) (a) *H* (i.e. MoS<sub>2</sub> monolayer) and (b) *Q* (i.e. PbS bilayer) layers. (c) The partial density of states for the *H* layer (Red), *Q* layer (Green), and the 2D MoS<sub>2</sub>-PbS heterostructure (Blue); (c)-(i) p-orbitals of the S atoms, (c)-(ii) d-orbitals of the Mo atoms and (c)-(iii) d-orbitals of the Pb atoms.

## 2.0. The Electrostatic Potential:

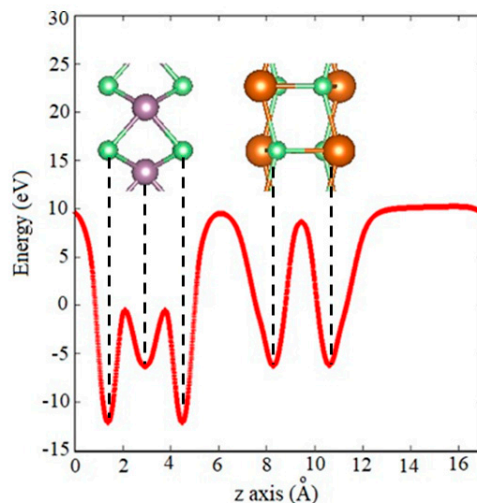

**Figure S3.** The calculated profile of the planar averaged self-consistent electrostatic potential of the 2D merelaniite heterostructure as a function of position.

## 3.0. VASP Calculations

In general, the HSE06 calculations are about two orders of magnitude computationally expensive in Quantum espresso than those in VASP [1]. Therefore, we have used the VASP code to perform HSE06 calculations on the 2D MoS<sub>2</sub>-PbS heterostructure [2,3] It is worth mentioning that the PBE (DFT) band structure calculated using VASP is nearly the same as obtained by the Quantum espresso. In VASP calculations, the energy cutoff was kept at 400 eV and the k-point grid was 7×7×1. The energy and forces were converged to 10<sup>-5</sup> eV and 10<sup>-2</sup> eV/Å, respectively.

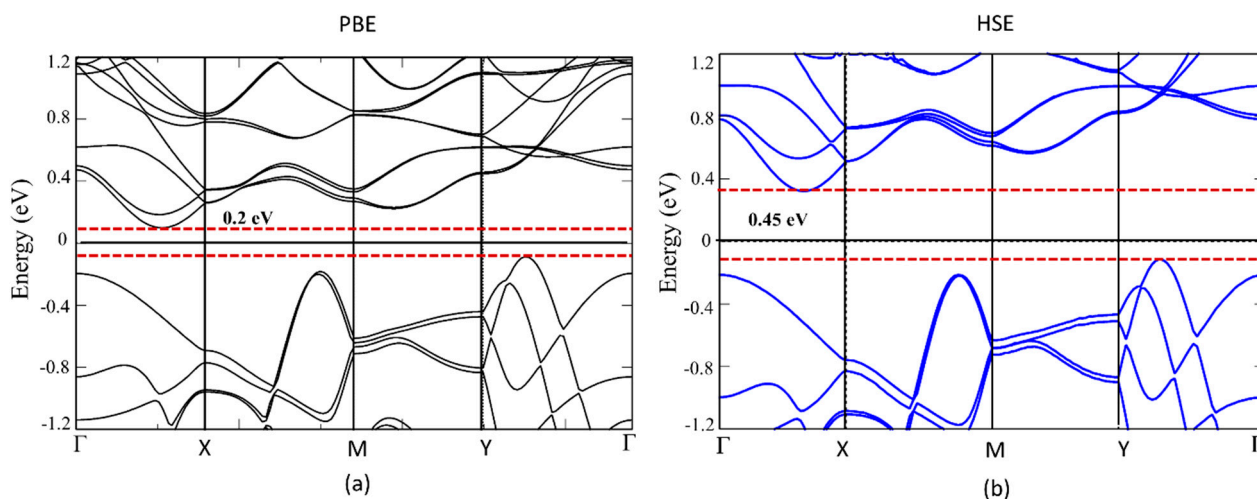

**Figure S4.** (a) Calculated PBE (DFT)+D2 band structure and (b) HSE06 band structure obtained at the PBE (DFT)+D2 structural configuration.

## 4.0. Calculations of Carrier Mobility

The room-temperature carrier mobilities ( $\mu_{2D}$ ) were calculated by applying a phonon-limited scattering model including the anisotropic characteristics of effective mass following the expression, Equation S1 given by Bardeen and Shockley [4].

$$\mu_{2D} = \frac{e\hbar^3 C_{2D}}{K_B T m^* m_a^* E_i^2} \quad (S1)$$

where  $e$  is the electronic charge,  $\hbar$  is the reduced Plank's constant,  $T$  is the temperature,  $k_B$  is the Boltzmann constant,  $m^*$  is the effective mass in either along  $x$ - or  $y$ - direction,  $m_a^*$  is the average effective mass given by  $\sqrt{m_x^* m_y^*}$ .  $E_i$  is the deformation-potential constant calculated using the expression,  $E_i = \frac{dE_{edge}}{de}$  where  $E_{edge}$  is the energy of the CBM (VBM) for electrons (holes) and  $e = \Delta l/l_0$ , and  $\Delta l/l_0$  is the strain/lattice dilation along  $x$ - or  $y$ -direction.

The in-plane elastic modulus,  $C_{2D}$  was calculated using:

$$(E - E_0)/S_0 = C_{2D} (\Delta l/l_0)^2/2 \quad (S2)$$

where  $E - E_0$  represents total energy change,  $S_0$  is the area of the 2D cell and,  $\Delta l/l_0$  is the the strain along  $x$  or  $y$ -direction [5]. It is worth mentioning that the expression, Equation S1 (ESI) gives only an estimated value of the carrier mobility in a given material [6].

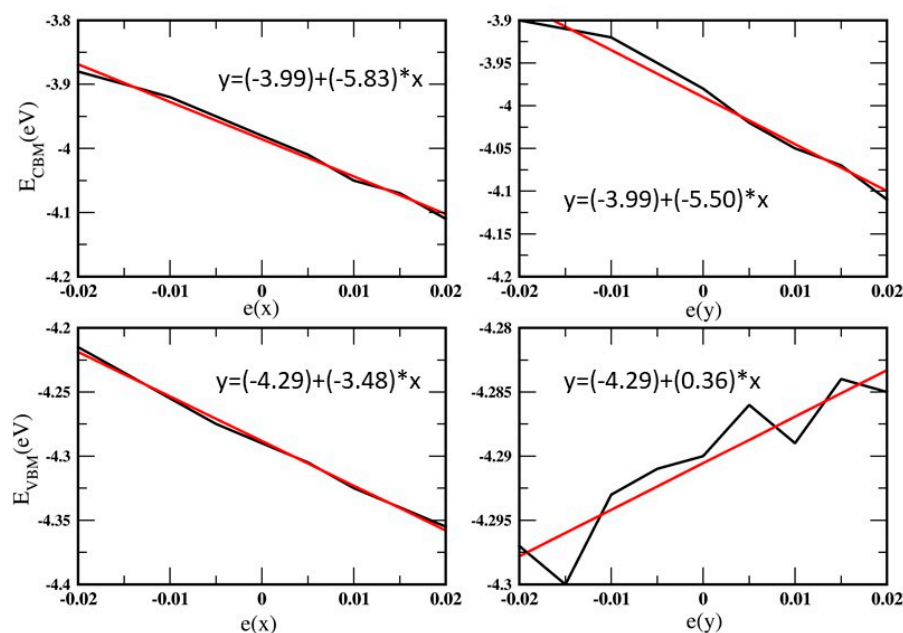

**Figure S5.** Band energy ( $E_{edge}$ ) of CBM and VBM as a function of lattice dilation  $e$  along  $x$  and  $y$  directions for 2D MoS<sub>2</sub>-PbS heterostructure.

## 5.0. Structural Parameters for MoS<sub>2</sub>-PbS Heterostructure

| Lattice Vectors (Å) |              |               |
|---------------------|--------------|---------------|
| 5.4739656448        | 0.0000000000 | 0.0000000000  |
| 0.0000000000        | 6.3207879066 | 0.0000000000  |
| 0.0000000000        | 0.0000000000 | 24.0000000000 |

| Atomic Positions (Cartesian Coordinates) |          |          |
|------------------------------------------|----------|----------|
| 0.912116                                 | 0.790098 | 1.365608 |
| 3.652712                                 | 2.364822 | 1.362597 |
| 0.91875                                  | 3.950492 | 1.35763  |
| 3.652712                                 | 5.536163 | 1.362597 |
| 0.916813                                 | 0.790098 | 4.532084 |
| 3.652164                                 | 2.377615 | 4.519615 |
| 0.913364                                 | 3.950492 | 4.492824 |
| 3.652164                                 | 5.52337  | 4.519615 |
| 0.908153                                 | 0.790098 | 8.504323 |
| 3.643472                                 | 0.790098 | 10.43171 |
| 0.909773                                 | 3.950492 | 10.49807 |
| 3.646854                                 | 3.950492 | 8.52363  |
| 4.56393                                  | 0.790098 | 2.948438 |
| 1.826947                                 | 2.36821  | 2.938384 |
| 4.562025                                 | 3.950492 | 2.930117 |
| 1.826947                                 | 5.532775 | 2.938384 |
| 0.907365                                 | 0.790098 | 11.12649 |
| 3.645749                                 | 0.790098 | 7.809825 |
| 0.908142                                 | 3.950492 | 7.883156 |
| 3.645267                                 | 3.950492 | 11.1454  |

## References:

1. <https://mattermodeling.stackexchange.com/questions/561/quantum-espresso-vs-vasp>. (Accessed on January 15, 2021).
2. Heyd, J.; Scuseria, G. E.; Ernzerhof, M. Hybrid Functionals Based on a Screened Coulomb Potential. *J. Chem. Phys.* 2003, 118 (18), 8207–8215.
3. Kresse, Georg, and D. J. From Ultrasoft Pseudopotentials to the Projector Augmented-Wave Method. *Phys. Rev. B* 1999, 59 (3), 1758.
4. Bardeen, J.; Shockley, W. Deformation Potentials and Mobilities in Non-Polar Crystals. *Phys. Rev.* 1950, 80 (1), 72–80. <https://doi.org/10.1103/PhysRev.80.72>.
5. Gaddemane, G.; Vandenberghe, W. G.; van de Put, M. L.; Chen, S.; Tiwari, S.; Chen, E.; Fischetti, M. V. Theoretical Studies of Electronic Transport in Mono- and Bi-Layer Phosphorene: A Critical Overview. arXiv 2018, 98, 115416.
6. Qiao, Jingsi, Xianghua Kong, Zhi-Xin Hu, Feng Yang, and Ji, Wei. High-Mobility Transport Anisotropy and Linear Dichroism in Few-Layer Black Phosphorus. *Nat. Commun.* 2014, 5 (1), 1–7.
